# Supplementary material for: Multispectral and Molecular Docking Studies Reveal Potential Effectiveness of Antidepressant Fluoxetine by Forming π-Acceptor Complexes
Source: MDPI journal article supplement (doi:10.3390/molecules27185883), 2022-09-10
Supplement: s1 [file s1]

# Supplementary Material

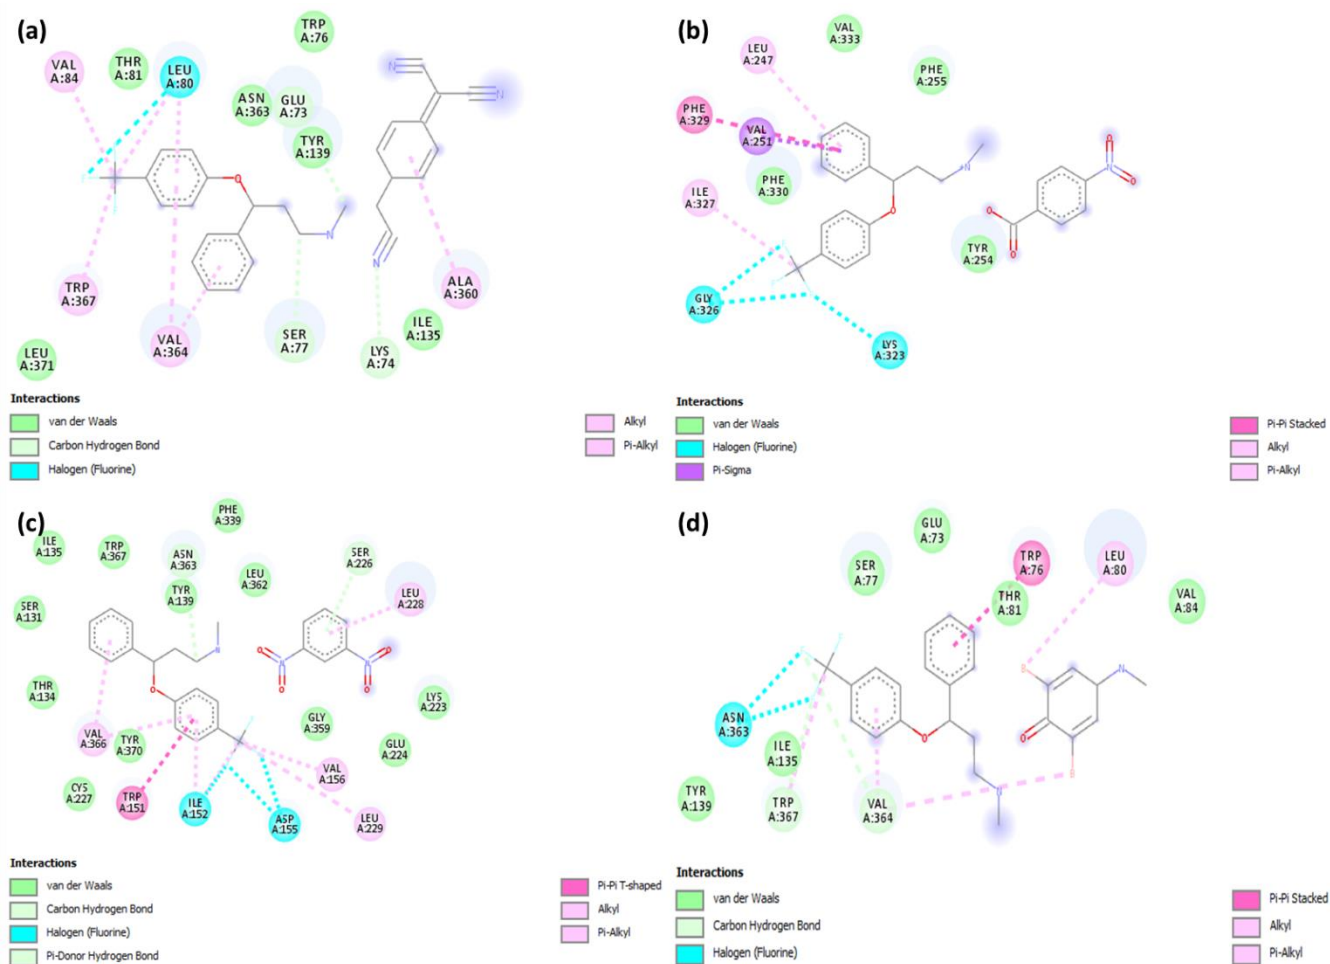

**Figure S1.** 2D illustration of the interactions of (a) [(FXN)(TCNQ)]-serotonin, (b) [(FXN)(pNBA)]-serotonin, (c) [(FXN)(DNB)]-serotonin, and (d) [(FXN)(DCQ)]-serotonin.

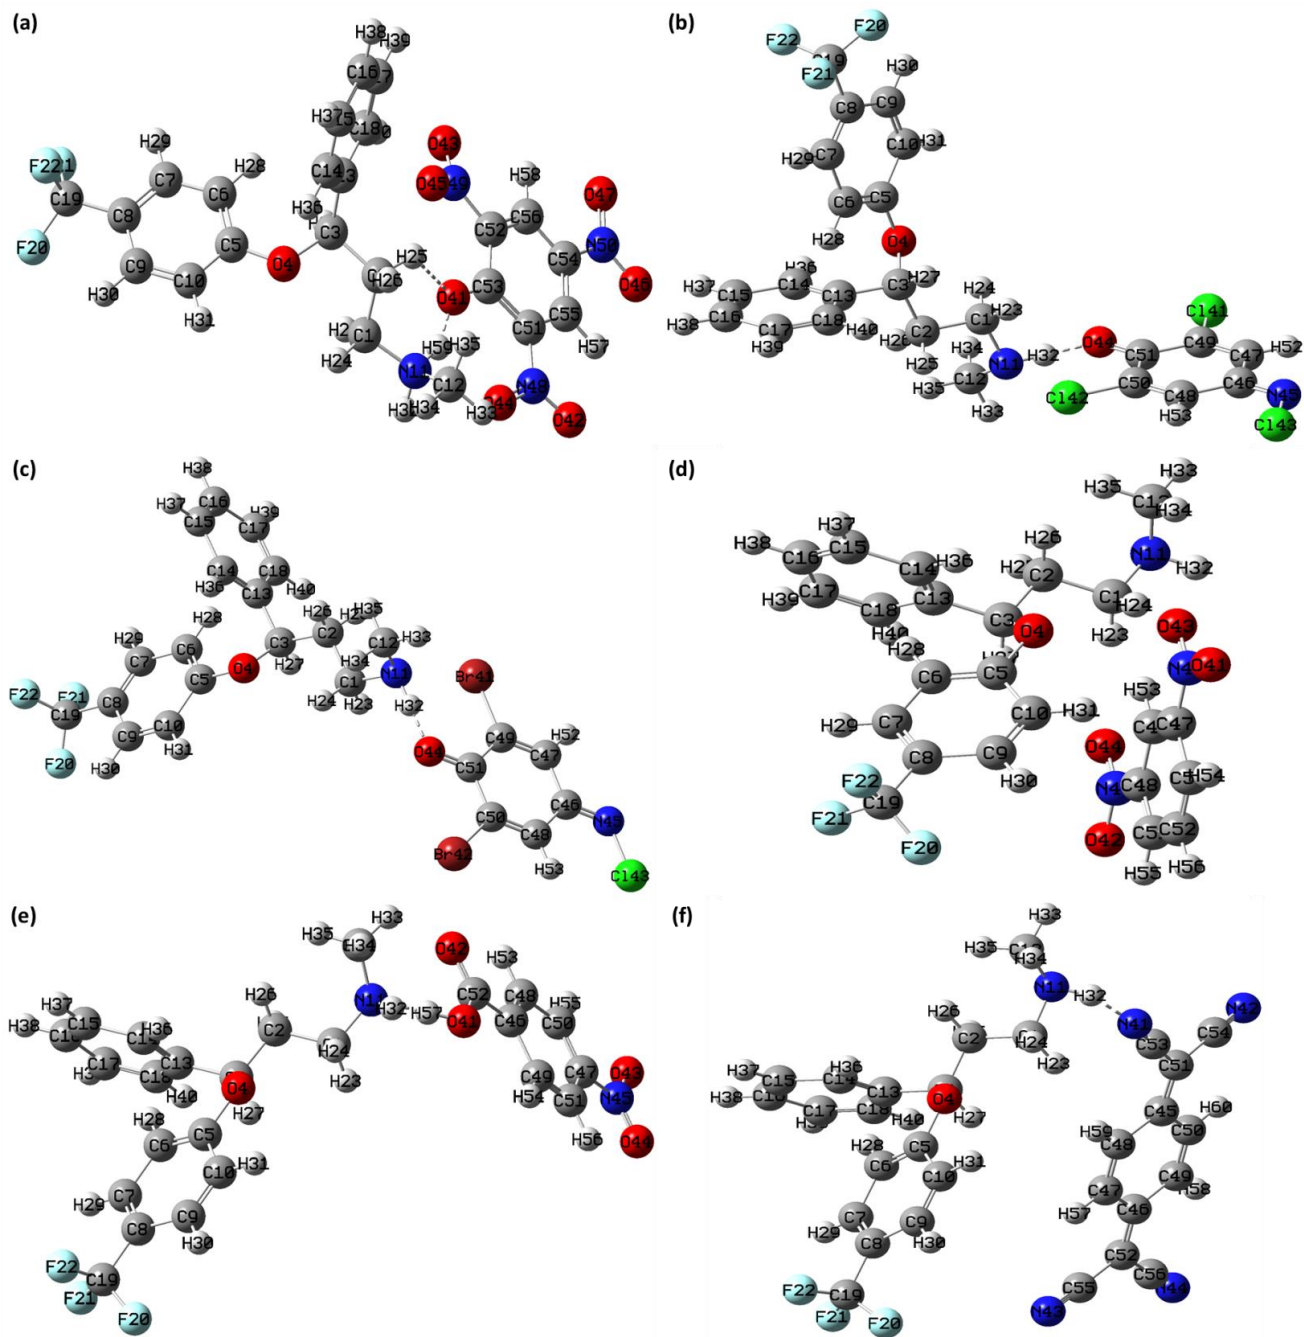

**Figure S2.** Optimized structure of the CTcomplexes- (a)[(FNX)(PA)], (b) [(FNX)(DCQ)], (c) [(FNX)(DBQ)], (d) [(FNX)(DNB)], (e) [(FNX)(pNBA)], and (f) [(FNX)(TCNQ)] with Mulliken atom numbering scheme.

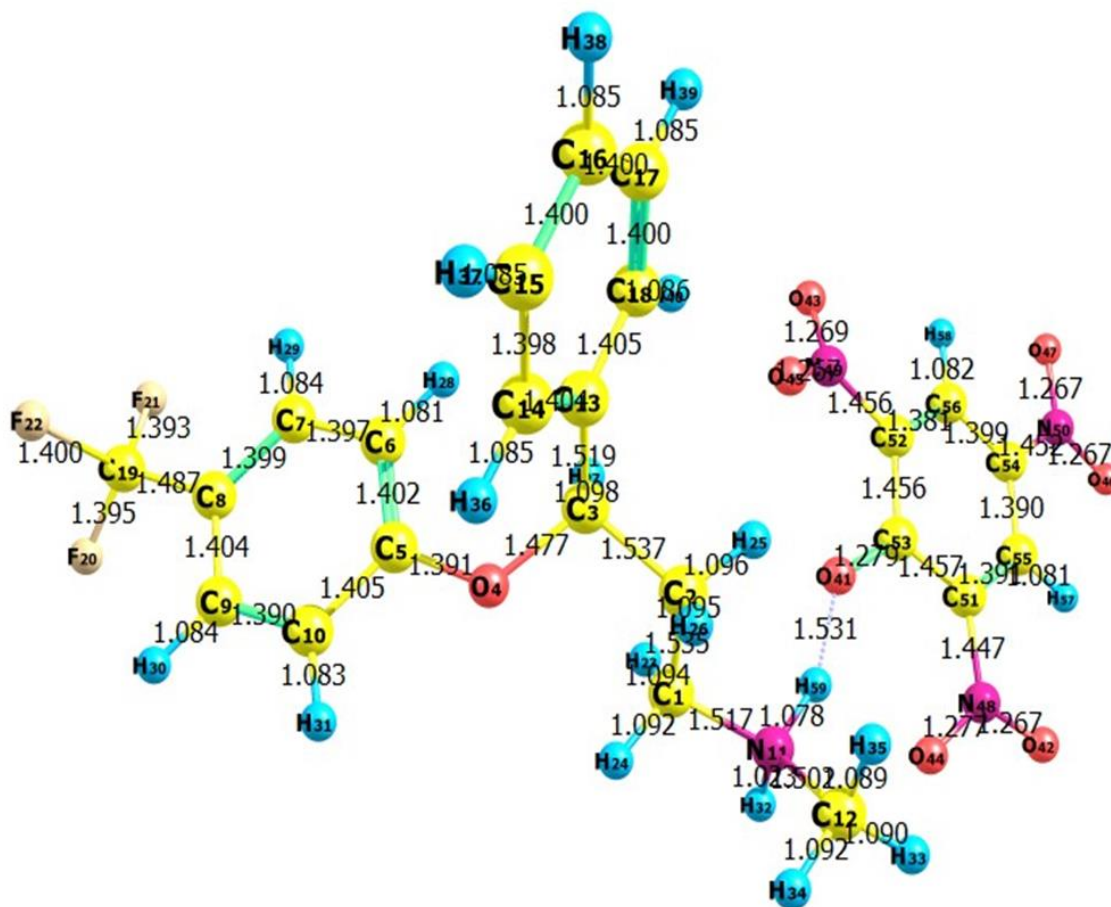

**Table S1.** [(FXN)(PA)-serotonin interactions results by DS.

| Name                    | Distance | Category      | Type                       |
|-------------------------|----------|---------------|----------------------------|
| ASN363:H - [(FXN)(PA):O | 2.29436  | Hydrogen Bond | Conventional Hydrogen Bond |
| ASN363:H - [(FXN)(PA):O | 1.9154   | Hydrogen Bond | Conventional Hydrogen Bond |
| ASP155:O - [(FXN)(PA]   | 4.54706  | Electrostatic | Pi-Anion                   |
| [(FXN)(PA]:C - LEU229   | 4.75129  | Hydrophobic   | Alkyl                      |
| PHE339 - [(FXN)(PA]:C   | 4.99763  | Hydrophobic   | Pi-Alkyl                   |
| [(FXN)(PA] - VAL366     | 5.06449  | Hydrophobic   | Pi-Alkyl                   |
| [(FXN)(PA] - VAL366     | 4.80608  | Hydrophobic   | Pi-Alkyl                   |

**TableS2.** FXN-serotonin interactions results by DS.

| Name                      | Distance | Category      | Type                 |
|---------------------------|----------|---------------|----------------------|
| SER159:C - FXN:F          | 3.46786  | Hydrogen Bond | Carbon Hydrogen Bond |
| SER159:O - FXN:F1         | 3.05844  | Halogen       | Halogen (Fluorine)   |
| SER242:O - :FXN:F2        | 3.05139  | Halogen       | Halogen (Fluorine)   |
| ASP155:O - FXN            | 3.50266  | Electrostatic | Pi-Anion             |
| TRP336 - FXN              | 4.81774  | Hydrophobic   | Pi-Pi T-shaped       |
| PHE340 - FXN              | 4.91544  | Hydrophobic   | Pi-Pi T-shaped       |
| SER159:C,O;THR160:N - FXN | 5.10599  | Hydrophobic   | Amide-Pi Stacked     |
| PHE243 - FXN:C17          | 5.39225  | Hydrophobic   | Pi-Alkyl             |
| PHE332 - FXN:C17          | 5.12623  | Hydrophobic   | Pi-Alkyl             |
| PHE340 - FXN:C17          | 4.80155  | Hydrophobic   | Pi-Alkyl             |

**Table S3.** The bond lengths of the CT complex [(FNX)(PA)] obtained through DFT.

| S.No. | [(FNX)(PA)](RB3LYP/6-311G++) |                   |          |                   |
|-------|------------------------------|-------------------|----------|-------------------|
|       | AtomNo.                      | Bondlengt<br>h(Å) | AtomNo.  | Bondlengt<br>h(Å) |
| 1     | R(1-2)                       | 1.535             | R(14-36) | 1.085             |
| 2     | R(1-11)                      | 1.517             | R(15-16) | 1.4               |
| 3     | R(1-23)                      | 1.094             | R(15-37) | 1.085             |
| 4     | R(1-24)                      | 1.092             | R(16-17) | 1.4               |
| 5     | R(2-3)                       | 1.537             | R(16-38) | 1.085             |
| 6     | R(2-25)                      | 1.096             | R(17-18) | 1.4               |
| 7     | R(2-26)                      | 1.095             | R(17-39) | 1.085             |
| 8     | R(3-4)                       | 1.477             | R(18-40) | 1.086             |
| 9     | R(3-13)                      | 1.519             | R(19-20) | 1.395             |
| 10    | R(3-27)                      | 1.098             | R(19-21) | 1.393             |
| 11    | R(4-5)                       | 1.391             | R(19-22) | 1.4               |
| 12    | R(5-6)                       | 1.402             | R(41-53) | 1.279             |
| 13    | R(5-10)                      | 1.405             | R(42-48) | 1.267             |
| 14    | R(6-7)                       | 1.397             | R(43-49) | 1.269             |
| 15    | R(6-28)                      | 1.081             | R(44-48) | 1.277             |
| 16    | R(7-8)                       | 1.399             | R(45-49) | 1.267             |
| 17    | R(7-29)                      | 1.084             | R(46-50) | 1.267             |
| 18    | R(8-9)                       | 1.404             | R(47-50) | 1.267             |
| 19    | R(8-19)                      | 1.487             | R(48-51) | 1.447             |
| 20    | R(9-10)                      | 1.39              | R(49-52) | 1.456             |
| 21    | R(9-30)                      | 1.084             | R(50-54) | 1.452             |
| 22    | R(10-31)                     | 1.083             | R(51-53) | 1.457             |
| 23    | R(11-12)                     | 1.502             | R(51-55) | 1.391             |
| 24    | R(11-32)                     | 1.023             | R(52-53) | 1.456             |
| 25    | R(11-59)                     | 1.078             | R(52-56) | 1.381             |
| 26    | R(12-33)                     | 1.09              | R(54-55) | 1.39              |
| 27    | R(12-34)                     | 1.092             | R(54-56) | 1.399             |
| 28    | R(12-35)                     | 1.089             | R(55-57) | 1.081             |
| 29    | R(13-14)                     | 1.404             | R(56-58) | 1.082             |
| 30    | R(13-18)                     | 1.405             | R(41-59) | 1.531             |
| 31    | R(14-15)                     | 1.398             |          |                   |

**Table S4.** The bond angles of the CT complex [(FNX)(PA)] obtained through DFT.

| S.No. | [(FNX)(PA)](RB3LYP/6-311G++) |              |             |              |
|-------|------------------------------|--------------|-------------|--------------|
|       | AtomNo.                      | BondAngle(Å) | AtomNo.     | BondAngle(Å) |
| 1     | A(2-1-11)                    | 111.8        | A(11-59-41) | 157.9        |
| 2     | A(2-1-23)                    | 110.4        | A(33-12-34) | 110.8        |
| 3     | A(2-1-24)                    | 111.5        | A(33-12-35) | 109.4        |
| 4     | A(1-2-3)                     | 111.7        | A(34-12-35) | 109.9        |
| 5     | A(1-2-25)                    | 109.7        | A(14-13-18) | 119.6        |
| 6     | A(1-2-26)                    | 110.8        | A(13-14-15) | 120.2        |
| 7     | A(11-1-23)                   | 105.5        | A(13-14-36) | 119.5        |
| 8     | A(11-1-24)                   | 108.7        | A(13-18-17) | 120          |
| 9     | A(1-11-12)                   | 116          | A(13-18-40) | 120          |
| 10    | A(1-11-32)                   | 109.7        | A(15-14-36) | 120.3        |
| 11    | A(1-11-59)                   | 107          | A(14-15-16) | 120.2        |
| 12    | A(23-1-24)                   | 108.7        | A(14-15-37) | 119.8        |
| 13    | A(3-2-25)                    | 107          | A(16-15-37) | 120.1        |
| 14    | A(3-2-26)                    | 108.6        | A(15-16-17) | 119.8        |
| 15    | A(2-3-4)                     | 104.8        | A(15-16-38) | 120.1        |
| 16    | A(2-3-13)                    | 112.4        | A(17-16-38) | 120.1        |
| 17    | A(2-3-27)                    | 108.7        | A(16-17-18) | 120.3        |
| 18    | A(25-2-26)                   | 108.9        | A(16-17-39) | 120.1        |
| 19    | A(4-3-13)                    | 112.2        | A(18-17-39) | 119.6        |
| 20    | A(4-3-27)                    | 108.3        | A(17-18-40) | 120          |
| 21    | A(3-4-5)                     | 120.7        | A(20-19-21) | 107.2        |
| 22    | A(13-3-27)                   | 110.2        | A(20-19-22) | 105.7        |
| 23    | A(3-13-14)                   | 120.7        | A(21-19-22) | 106          |
| 24    | A(3-13-18)                   | 119.7        | A(41-53-51) | 124.8        |
| 25    | A(4-5-6)                     | 124.5        | A(41-53-52) | 121.5        |
| 26    | A(4-5-10)                    | 115.2        | A(53-41-59) | 138.7        |
| 27    | A(6-5-10)                    | 120.4        | A(42-48-44) | 121.5        |
| 28    | A(5-6-7)                     | 119.3        | A(42-48-51) | 118.5        |
| 29    | A(5-6-28)                    | 121.3        | A(43-49-45) | 122.8        |
| 30    | A(5-10-9)                    | 120          | A(43-49-52) | 117.6        |
| 31    | A(5-10-31)                   | 118.8        | A(44-48-51) | 120          |
| 32    | A(7-6-28)                    | 119.4        | A(45-49-52) | 119.6        |
| 33    | A(6-7-8)                     | 120.5        | A(46-50-47) | 124          |
| 34    | A(6-7-29)                    | 119.6        | A(46-50-54) | 118.1        |
| 35    | A(8-7-29)                    | 119.9        | A(47-50-54) | 117.9        |
| 36    | A(7-8-9)                     | 119.8        | A(48-51-53) | 121.4        |
| 37    | A(7-8-19)                    | 120.3        | A(48-51-55) | 116          |
| 38    | A(9-8-19)                    | 119.8        | A(49-52-53) | 120.5        |
| 39    | A(8-9-10)                    | 120          | A(49-52-56) | 116.3        |
| 40    | A(8-9-30)                    | 119.9        | A(50-54-55) | 119.4        |
| 41    | A(8-19-20)                   | 112.2        | A(50-54-56) | 119.4        |
| 42    | A(8-19-21)                   | 112.5        | A(53-51-55) | 122.6        |
| 43    | A(8-19-22)                   | 112.9        | A(51-53-52) | 113.8        |
| 44    | A(10-9-30)                   | 120          | A(51-55-54) | 119.8        |
| 45    | A(9-10-31)                   | 121.3        | A(51-55-57) | 119.9        |
| 46    | A(12-11-32)                  | 108.7        | A(53-52-56) | 123.2        |

|    |             |       |             |       |
|----|-------------|-------|-------------|-------|
| 47 | A(12-11-59) | 109.7 | A(52-56-54) | 119.4 |
| 48 | A(11-12-33) | 107.8 | A(52-56-58) | 120.2 |
| 49 | A(11-12-34) | 109.9 | A(55-54-56) | 121.2 |
| 50 | A(11-12-35) | 108.9 | A(54-55-57) | 120.3 |
| 51 | A(32-11-59) | 105.2 | A(54-56-58) | 120.4 |

**Table S5.** Mulliken atomic charges of the CT complex [(FNX)(PA)] atoms.

| S.No. | Synthesized complex    |                         |                        |                         |
|-------|------------------------|-------------------------|------------------------|-------------------------|
|       | Mulliken atomic number | Mulliken atomic charges | Mulliken atomic number | Mulliken atomic charges |
|       | s                      |                         | s                      |                         |
| 1     | 1C                     | -0.11393                | 31H                    | 0.1429                  |
| 2     | 2C                     | -0.27234                | 32H                    | 0.37164                 |
| 3     | 3C                     | 0.01759                 | 33H                    | 0.2177                  |
| 4     | 4O                     | -0.59644                | 34H                    | 0.17726                 |
| 5     | 5C                     | 0.30873                 | 35H                    | 0.20164                 |
| 6     | 6C                     | -0.12734                | 36H                    | 0.14117                 |
| 7     | 7C                     | -0.12458                | 37H                    | 0.13073                 |
| 8     | 8C                     | -0.01528                | 38H                    | 0.13209                 |
| 9     | 9C                     | -0.10953                | 39H                    | 0.13799                 |
| 10    | 10C                    | -0.14373                | 40H                    | 0.17739                 |
| 11    | 11N                    | -0.68421                | 41O                    | -0.56844                |
| 12    | 12C                    | -0.28452                | 42O                    | -0.28615                |
| 13    | 13C                    | 0.06085                 | 43O                    | -0.29039                |
| 14    | 14C                    | -0.13773                | 44O                    | -0.36246                |
| 15    | 15C                    | -0.13076                | 45O                    | -0.2871                 |
| 16    | 16C                    | -0.11455                | 46O                    | -0.29116                |
| 17    | 17C                    | -0.13805                | 47O                    | -0.29029                |
| 18    | 18C                    | -0.15477                | 48N                    | 0.0416                  |
| 19    | 19C                    | 0.68878                 | 49N                    | 0.04014                 |
| 20    | 20F                    | -0.28482                | 50N                    | 0.03257                 |
| 21    | 21F                    | -0.28338                | 51C                    | 0.29762                 |
| 22    | 22F                    | -0.27489                | 52C                    | 0.27222                 |
| 23    | 23H                    | 0.18708                 | 53C                    | 0.33923                 |
| 24    | 24H                    | 0.18534                 | 54C                    | 0.29149                 |
| 25    | 25H                    | 0.21882                 | 55C                    | -0.11157                |
| 26    | 26H                    | 0.15191                 | 56C                    | -0.08503                |
| 27    | 27H                    | 0.16172                 | 57H                    | 0.23793                 |
| 28    | 28H                    | 0.16271                 | 58H                    | 0.23549                 |
| 29    | 29H                    | 0.16952                 | 59H                    | 0.46715                 |
| 30    | 30H                    | 0.16439                 |                        |                         |
